# Supplementary material
Source: PubMed Central journal article supplement (PMC3890851)
Supplement: 1311239111_pnas.201311239SI.pdf [file 1311239111_pnas.201311239SI.pdf]

# Supporting Information

You et al. 10.1073/pnas.1311239111

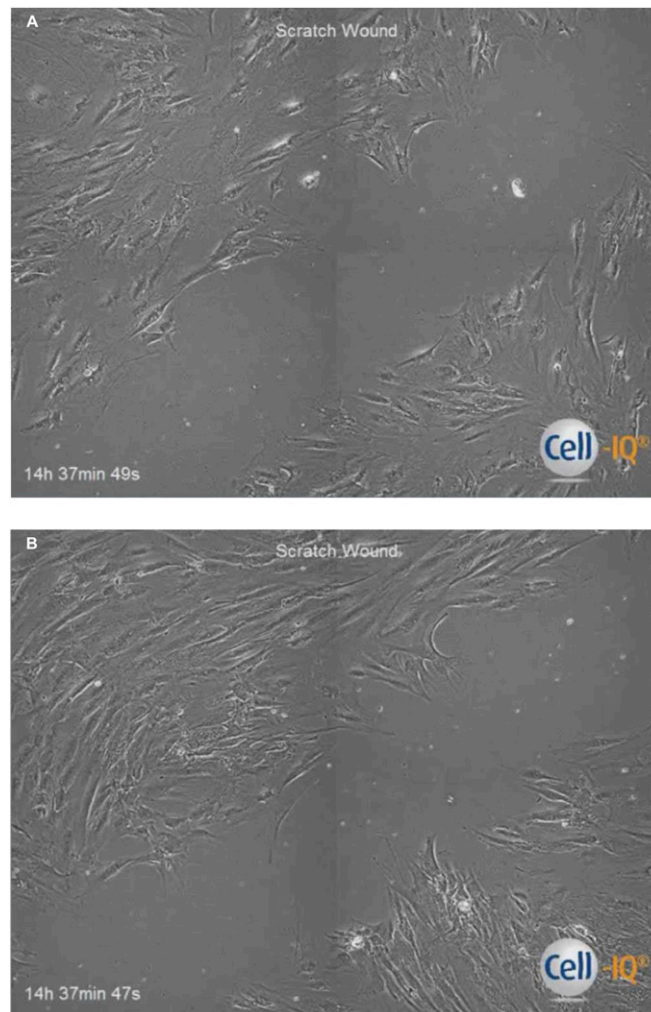

**Movie S1.** Real-time dynamics of fibroblast-like synoviocyte (FLS) migration. Confluent cultures of rheumatoid arthritis (RA)-FLSs transfected with POSTN siRNA (A) or control siRNA (B) were scratched, and wound closure was examined over a period of 50 h. Images were taken with Cell-IQ.

[Movie S1A](#)

[Movie S1B](#)

**Dataset S1.** Lists of the differentially expressed genes (DEGs) in RA-FLS, RA-synovial macrophages (RA-SMs), and IL-1 $\beta$ -stimulated RA-FLSs. The list of the DEGs from each comparison includes Entrez ID, gene description, *P* value, and log<sub>2</sub>-fold change

[Dataset S1](#)

## Other Supporting Information Files

[SI Appendix \(PDF\)](#)
