# Supplementary material
Source: PubMed Central journal article supplement (PMC3890851)
Supplement: 1311239111_sapp.pdf [file 1311239111_sapp.pdf]

## Supporting Information (SI)

### SI Results

**POSTN and TWIST1 promote FLS migration *in vivo*.** The *in vivo* experiment was performed to confirm the regulation of FLS migration by POSTN or TWIST1. To this end, skin inflammation was induced by subcutaneous injection of complete Freund's adjuvant (CFA) into the right and left back skin of immuno-deficient mice (**Fig. S5C**). One day after the CFA injection, RA-FLS ( $5 \times 10^5$ ), labeled with fluorescent dyes of NIR 675, were implanted intra-dermally into the mice at a fixed distance (1.2 cm) from the site of the CFA injection (**Fig. S5C**); Prior to labeling with NIR 675, RA-FLS were transfected with control siRNA, POSTIN siRNA or TWIST1 siRNA for 24 hours. The FLS transfected with siRNA for POSTIN or TWIST1 were implanted into the right back skin exactly opposite to the control siRNA-harboring site on the left. After 5 days of implantation, skin samples were obtained from the FLS-implanted site, CFA-injected site, and between the two (**a**, **c**, and **b** in **Fig. S5C**, respectively). As seen in **Fig. S5C**, a cluster of human HLA class I (+) cells, indicating RA-FLS, were highly detectable at all the FLS-implanted sites of the left and right back skin, indicating that human FLS are successfully engrafted in the immuno-deficient mice. Analysis of entire areas between FLS-implanted and CFA-injected site revealed that HLA class I (+) cells were more frequently found in the skin on the left with control siRNA than in those on the right with POSTIN siRNA or TWIST1 siRNA (**Fig. S5D** and **S5E**). The number of fluorescence (+) cells showed similar results (**Fig. S5D**), suggesting that POSTIN siRNA or TWIST1 siRNA reduces FLS migration toward the CFA-injected site with dermal inflammation. However, RA-FLS were rarely detected at the CFA-injected site, irrespective of siRNA transfection. Overall, these data suggest that POSTIN siRNA or TWIST1 siRNA suppresses FLS migration *in vivo*.

## **SI Discussion**

**Implication of POSTN and TWIST1 in the invasion and migration.** Given the invasive characteristic of RA-FLS, POSTN and TWIST1 are the intriguing regulatory molecules. POSTN was primarily reported as a matricellular protein, which is secreted into the extracellular environment or matrix. It modulates cell function by interacting with cell-surface receptors, proteases, and other bio-effector molecules, as well as with structural matrix proteins, such as collagens (1). In addition to its extracellular activity, POSTN intracellularly regulates EMT and fibrosis under a wide variety of tumorigenic conditions and tissue repair (2-4). Through POSTN-mediated signaling, tumor cells undergoing fibroblast-like transformation as well as dermal fibroblasts acquire enhanced migratory activity, which could potentially partly determine their invasiveness and profibrotic capacity, respectively (5, 6). TWIST1 belongs to the basic helix-loop-helix (bHLH) transcription-factor family and is well-known for promoting EMT by repressing the expression of E-cadherin, which leads to the disassembly of adherens junctions and pro-migratory potential of various tumor cells and mesenchymal cells (7, 8). Interestingly, POSTN is closely linked to TWIST1 (9), and both of them are activated and play key roles in the organ development process, such as lineage commitment and cellular differentiation (1, 10). In the present study, the involvement of POSTN and TWIST1 in the invasiveness of RA-FLS is novel and has important ramifications for the understanding of the unique aggressive phenotype of RA-FLS and pannus formation.

## **SI Materials and Methods**

**Isolation of RA-FLS and SM.** FLS were obtained from the synovial tissues of RA or OA patients as described previously (11), and incubated in Dulbecco's modified Eagle's medium (DMEM) supplemented with fetal calf serum (FCS; Gibco, Carlsbad, CA) or with insulin-

transferrin-selenium A (ITSA; Life Technologies, Gaithersburg, MD). The purity of FLS was tested by flow cytometry analysis using phycoerythrin-conjugated anti-CD14 (BD PharMingen, San Diego, CA) and fluorescein isothiocyanate-conjugated anti-Thy-1 (CD90) monoclonal antibody (BD PharMingen). Most cells (>99%) had the surface marker for fibroblasts (Thy-1). Monocytes/macrophages were obtained from mononuclear cells of healthy controls or from the synovial fluid of RA patients using anti-CD14 magnetic beads (Miltenyi Biotec, Auburn, CA), according to the manufacturer's instructions. To induce differentiation into macrophages, peripheral blood monocytes of healthy controls were cultured for 24 hours in RPMI 1640 medium supplemented with 10% FCS in the presence of human M-CSF (20 ng/ml). OA macrophages were freshly isolated from synovial tissues of OA patients using anti-CD14 magnetic beads as described previously (12). The study protocol was approved by the Institutional Review Board of the Catholic Medical Center (XC09TIMI0070). All patients gave written informed consent to the study protocol.

**Microarray analysis.** In each condition, we prepared total RNA independently from three replicate samples using the RNeasy mini kit (Qiagen, Hilden, Germany) and assessed RNA integrity using Bioanalyzer 2100 (Agilent Technologies, Santa Clara, CA). The RNA integrity number (PRN) was close to 10 for all samples. RNA was then amplified and hybridized to the Illumina HumanHT-12 v4.0 (for FLS) and HumanRef-8 WG-DASL v3 (for synovial macrophages) Expression BeadChip, according to Illumina standard protocols. The probe intensities were normalized using the quantile normalization procedure (13). The data were deposited into the GEO database (GEO accession ID, GSE49604).

**Integrative statistical testing for identification of DEGs.** For the four comparisons 1)

RA-FLS/OA-FLS, 2) RA-SM/healthy controls, 3) RA-FLS+IL1 $\beta$ /OA-FLS, and 4) RA-FLS+IL1 $\beta$ /OA-FLS+IL1 $\beta$ ), we used the integrative statistical method previously reported (14), rather than the conventional t-test and fold-change tests. The t-test can mistakenly identify the genes that have small mean differences, but have further smaller pooled standard deviations, which lead to large t-statistic values close to infinity. On the other hand, the fold-change-based test can mistakenly identify the genes that have large mean differences, but have larger pooled standard deviations with fluctuating expression in replicates under individual conditions. By integrating adjusted the *P*-values from these two tests using Stouffer's method, these false positives can be reduced. See 'Statistical analyses' for the detailed procedures of the integrative statistical method.

**Hierarchical clustering of DEGs.** From the comparisons of RA-FLS/OA-FLS and RA-SM/healthy controls, we identified a total of 2,376 DEGs. Before clustering these DEGs, they were categorized into the three groups ('Shared', 'FLS-dominant', and 'SM-dominant'). For the DEGs in each group, we further performed a hierarchical clustering using Euclidean distance as the dissimilarity measure and the average linkage method: four clusters (C1-4) for shared DEGs, two clusters (C5-6) for FLS-dominant DEGs, and two clusters (C7-8) for SM-dominant DEGs (*See heat maps in Fig. 1B*).

**Modular enrichment analysis.** To quantitatively assess the contribution of RA-FLS and RA-SM to the individual modules, we calculated a module enrichment score (MES), which was defined as  $[(\text{number of DEGs within a module}) / (\text{total number of genes within the module})] / [(\text{total number of DEGs in the network}) / (\text{total number of signature genes})]$ , a modified version of fold enrichment score in the DAVID software (15, 16).

**Evaluation of statistical significance of module enrichment scores (MES).** To evaluate the significance of a MES in **Fig. S3B**, we performed the following random sampling method: 1) for module  $i$ , we counted genes in the module among up-regulated genes; 2) we randomly sampled the same number of up-regulated genes from the whole genome, and then counted randomly sampled genes belonging to module  $i$ ; 3) after repeating step 2 100,000 times, we estimated an empirical distribution of 100,000 counts of randomly sampled genes in module  $i$ ; and 4) for the actual count of genes in module  $i$ , we computed the  $P$ -value that the actual count can be observed by chance by the one-tailed test using empirical distribution. The same procedure was repeated for all modules in the network model.

**Reconstruction of a network model and arrangement of nodes into modules.** We focused on a network model describing cellular processes represented by the up-regulated genes in the three groups ('shared', 'FLS-dominant', and 'SM-dominant') shown in **Fig. 1C**. Among the 1818 up-regulated genes (396 up-regulated genes in RA-FLS, 691 genes in IL1 $\beta$ -stimulated RA-FLS, and 1048 genes in RA-SM), we first selected 357 up-regulated genes that were involved in the 16 cellular processes in **Fig. 1C**, which can be categorized the following two groups: 1) invasion-related processes, including ECM organization (ECM), regulation of EMT (EMT), WNT signaling (WNT), and cell adhesion and migration (CAM); and 2) inflammation-related processes, including inflammatory cytokines (IC), regulation of cell proliferation (RCP), cytoskeleton organization (CO), complement and coagulation (CC), chemotaxis (CK), JAK-STAT signaling (JS), anti-apoptosis (AA), response to ER-stress (RES), angiogenesis (AG), cytokine production (CP), antigen presentation (AP), and leukocyte activation (LA).

To reconstruct a network model for the 357 genes, we first downloaded all protein-

protein interactions (PPIs) stored in HPRD (17), BioGRID (18), STRING (19), and KEGG (20) and then combined all PPIs from the four databases into one list of PPIs. During this process, we converted protein IDs used in each database into Entrez IDs, converted directed PPIs from the KEGG pathway database into undirected PPIs to be compatible with undirected PPIs obtained from the three databases, and generated a list of non-redundant PPIs by removing redundant PPIs in the four databases. From the combined list of PPIs, we selected the PPIs among the 357 genes. All these procedures were implemented in a MATLAB. We then used Cytoscape version 2.8.2 to display these PPIs for the 357 genes as a network model.

Using the GOBPs (21) of the 357 genes corresponding to the aforementioned 16 cellular processes (**Fig. 1C**), we arranged the corresponding nodes in the network such that the ones with the same GOBPs were grouped into the same network modules, thereby resulting in 16 modules. Nodes can have multiple GOBPs of the 16 GOBPs. For each of these nodes, we counted the interactors with the multiple GOBPs and then included the node to the modules in which the largest number of its interactors was included.

**Knock-down of TWIST1 and POSTN transcripts.** RA-FLS were transfected with TWIST1, TGFB1I1, and POSTN siRNAs (Dharmacon, Lafayette, CO) using DharmaFect (Dharmacon, Lafayette, CO). Scrambled RNAs were purchased from Santa Cruz Biotechnology (Santa Cruz, CA).

**Real-time PCR.** Total RNA was subjected to cDNA synthesis using a High Capacity cDNA RT kit (Applied Biosystems, Foster City, CA), according to the manufacturer's instructions. Quantitative real-time PCR was performed in the CFX96™ Real-Time PCR System (Bio-

Rad, Hercules, CA) using SYBR Premix (Bio-Rad), according to the manufacturer's instructions. GAPDH was used as an internal control for PCR amplification. Transcript levels were calculated relative to controls, and relative fold inductions were calculated by using  $2^{-\Delta\Delta C_t}$  algorithm (22). The gene-specific primers used are listed in **Table S4**.

**Western blot analysis.** Cells were lysed in lysis buffer and insoluble material was removed by centrifugation at 12,000g for 20 minutes at 4°C. Final protein concentrations were determined using the Bradford protein assay (Bio-Rad). Electrophoresis was carried out using sodium dodecyl sulfate-10% polyacrylamide gels electrophoresis (SDS-PAGE), and the resolved proteins were transferred to nitrocellulose membranes. Membranes were incubated with antibodies (Abs) to TWIST1 (Abcam, Cambridge, UK), POSTN (Abcam), and  $\beta$ -actin (Sigma-Aldrich, St Louis, MO). Membranes were then visualized using an enhanced chemiluminescence technique (ECL). Resulting films were scanned and optical densities were quantified using Quantity On 1-D software (Bio-Rad) or ImageJ software (<http://rsb.info.nih.gov/ij/index.html>). Experiments were repeated three to four times for separate samples.

**Cell viability: MTT assay.** After knocking down TWIST1, TGFB1I1, and POSTN mRNA, synoviocyte viability was determined by an MTT assay, as described previously (23).

**Wound migration assay for synoviocyte.** After knocking down POSTN, TWIST1, and TGFB1I1, wound migration of RA-FLS was measured as described previously (12). In brief, RA-FLS plated to confluence on 60-mm culture dishes were wounded with pipette tips and then treated with IL1 $\beta$  in DMEM supplemented with 1% FBS. After 24 to 36 h incubation,

FLS migration was quantified by counting the cells that had moved beyond a reference line. Cell migration was also dynamically assessed by the Cell-IQ (Chip-Man Technologies, Tampere, Finland) over a period of 50 h, and the result images were then analyzed by batch process using the Analyser™ software. Three regions of interest per well per wound edge were chosen for imaging.

**Matrigel invasion assay.** The BD BioCoat Matrigel Invasion Chamber assay system (Becton Dickinson, Heidelberg, Germany) was used to study FLS invasion, according to the manufacturer's instructions. In brief, 24 h after transfection with siRNA, RA-FLS were allowed to migrate in Matrigel invasion chamber for additional 24 h in the presence of DMEM containing 10% FCS or 10 ng/ml of IL1 $\beta$  in DMEM supplemented with 1% FBS. The non-invading cells were afterward removed by scrubbing with a cotton-tipped swab, and the cells on the lower surface of the membrane were stained with Diff-Quik stain (Baxter Diagnostics, McGaw Park, IL). For quantification, cells were counted in eight random fields.

**Determination of FLS migration *in vivo*.** RA-FLS ( $5 \times 10^5$ ) were transfected with control siRNA, POSTIN siRNA or TWIST1 siRNA for 24 hours. The FLS were then labeled with 0.2 mg/ml of NEO-STEM™ containing fluorescent dyes of NIR 675 (Biterials, Seoul, Korea) (24), and the labeled cells were injected intra-dermally into the back of athymic nude mice (Jackson Laboratory, Bar Harbor, ME). One day before FLS implantation, skin inflammation was induced by subcutaneously injecting complete Freund's adjuvant (CFA) into the skin at a fixed distance (1.2 cm) from the injection site for FLS. After 5 days, skin samples were obtained from the FLS-implanted site, CFA-injected site, as well as between the two. Sections were analyzed under the confocal microscopy (Zeiss LSM 510; Carl Zeiss Inc.,



Thornwood, NJ) or subjected to immuno-histochemical staining for HLA class I. For immuno-histochemical staining, tissue sections were blocked with bovine serum albumin (BSA) for 30 minutes at room temperature. Sections were then incubated with Abs to HLA class I (1:100, Abcam) overnight at 4°C. Each slide was washed three times in TBS and incubated with biotinylated anti-mouse IgG (Vector Laboratories, Burlingame, CA) in a humid chamber for 30 minutes. HLA class I-positive cells were detected using peroxidase-conjugated streptavidin (Vector Laboratories) followed by 3'3-diaminobenzidine tetrahydrochloride (DAB; Vector Laboratories). The slides were counterstained with hematoxylin. Whole slide image capture was performed on a Panoramic MIDI slide scanner (3DHISTECH Ltd., Budapest, Hungary). The number of HLA-class I (+) cells, indicating RA-FLS, was determined by counting positively staining cells in digitalized images covering the entire area of skin.

**Statistical analyses.** Using normalized intensity values, DEGs from all the four comparisons 1) RA-FLS/OA-FLS, 2) RA-SM/healthy controls, 3) RA-FLS+IL1 $\beta$ /OA-FLS, and 4) RA-FLS+IL1 $\beta$ /OA-FLS+IL1 $\beta$ ) were identified using the integrative statistical method previously reported (14). Briefly, for each gene, an adjusted *P*-value was computed by performing a two-tailed T-test and log<sub>2</sub> median ratio test using the empirical distributions that were estimated by random permutations of the samples. The two sets of *P*-values from the individual tests were combined to compute the overall *P*-values using Stouffer's method (25). Finally, the DEGs were selected with the ones having 1)  $P \leq 0.05$ , 2) absolute log<sub>2</sub>-fold-changes larger than 1.34. To determine the cutoff value of log<sub>2</sub>-fold-changes, we computed log<sub>2</sub>-fold-changes of randomly permuted samples, fitted a Gaussian distribution to the random log<sub>2</sub>-fold-changes, and then calculated 2.5<sup>th</sup> percentile corresponding to  $\alpha = 0.05$  (log<sub>2</sub>-fold-change

cutoff = 1.34). The DEGs were grouped into eight clusters using hierarchical clustering. The cellular processes represented by the genes in each cluster were identified as the GO biological processes (GOBPs) having  $P < 0.1$  (the default cutoff value in the DAVID software) (15).

In the *in vitro* functional experiments, data are expressed as the mean  $\pm$  standard deviation (SD). Comparisons of the numerical data between groups were performed by the T-test or Mann-Whitney U-test.  $P$  values less than 0.05 were considered statistically significant.

## **SI Figures, Tables, Datasets, and Movies**

### **List of Supporting Figures**

**Fig. S1.** Cellular processes enriched by the genes in down-regulated clusters.

**Fig. S2.** Increased expression of pro-inflammatory genes in RA macrophages. Quantitative real-time PCR assays for a subset of genes representing SM-dominant cellular processes in RA (n=6) and OA macrophages (n=6) freshly isolated from synovial tissues. Relative mRNA expression was calculated by the  $2^{-\Delta\Delta C_t}$  algorithm. Results are the mean  $\pm$  SEM and represent three independent experiments. \*,  $P < 0.05$ .

**Fig. S3. Network model describing invasive potential of RA-FLS and inflammatory potential of SM.** (A) A network model describing the shared, FLS-dominant, and SM-dominant processes in **Figs. 1C and 2B**, which are represented by the 357 up-regulated DEGs in RA-FLS, RA-SM, and IL1 $\beta$ -stimulated RA-FLS. The nodes are arranged into the 16 modules as described in **SI Materials and Methods**. Node (magenta), boundary (red), and

label colors (blue) represent the DEGs in RA-FLS, IL1 $\beta$ -stimulated RA-FLS, and RA-SM, respectively (See the node and legend in the bottom). The modules were named by the corresponding GOBPs and distinguished by dotted lines. (B) 3-dimensional conic graphs showing module enrichment scores (MES) representing the contribution of RA-FLS and SM to the individual modules (Table S2). The three sets of MES were computed from the comparisons of RA-FLS and OA-FLS (left), RA-FLS+IL1 $\beta$  and unstimulated OA-FLS (middle), and RA-SM and control macrophages (right). The height of circular cones indicates the magnitude of the MES in the corresponding module. The purple cone represents that the *P*-value of MES for the corresponding modules is less than 0.01, while the gray cone represents MES with *P* > 0.01.

**Fig. S4. Selection process of key regulators responsible for the migration and invasion of FLS.** (A) Venn diagram depicting 946 up-regulated genes in either RA-FLS or IL1 $\beta$ -stimulated RA-FLS. (B) Selection process of 13 novel regulators out of the 946 up-regulated genes in either RA-FLS or IL1 $\beta$ -stimulated RA-FLS.

**Fig. S5. POSTN and TWIST1 control IL1 $\beta$ -induced FLS invasion.** (A and B) Regulation of FLS invasion by POSTN and TWIST1. Twenty four hours after transfection with POSTN siRNA, TWIST1 siRNA, or TGFB1I1 siRNA, RA-FLS were allowed to migrate in Matrigel invasion chamber for additional 24 h in the presence of DMEM containing 10% FCS (A) or 10 ng/ml of IL1 $\beta$  (B). Invaded cells were stained violet using Diff-Quik kit. Results are the mean  $\pm$  SEM, and represent three independent experiments. \*, *P* < 0.05. (C to E) Reduction of FLS migration *in vivo* by POSTN or TWIST1 siRNA. (C) A schematic model of the *in vivo* migration assay. In severe combined immune-deficient (SCID) mice, skin inflammation

was induced by subcutaneously injecting complete Freund's adjuvant (CFA, 120  $\mu$ g) into site (a). One day after the CFA injection, RA-FLS ( $5 \times 10^5$ ) labeled with fluorescent dyes of NIR 675 (NEO-STEM<sup>TM</sup>) were implanted intra-dermally in site (c), which is 1.2 cm apart from site (a). After 5 days of the FLS implantation, skin samples were obtained from sites (a), (b), and (c). In the top portion, increased dermal infiltration of inflammatory cells in the CFA-injected site was seen in the hematoxyllin and eosin stain. In the bottom portion, a cluster of RA-FLS (arrowheads) was detected in the skin obtained from site (a), as determined by immuno-histochemical staining using anti-HLA class I antibody. (D) Confocal microscopic or immuno-histochemical analysis of the skin tissues between FLS implantation and CFA injection site. NIR 675-labeled RA-FLS appear green under the confocal microscopy (left panel). The cells positive for HLA class I, indicating RA-FLS, are shown in brown (right panel). Rectangular areas on the right are magnified to the photographs on the left. Data are the representative photographs of independent experiments performed in more than five skin sections for each mouse. (E) Numbers of RA-FLS stained with anti-HLA class I antibody. Cells were manually counted in digitalized images covering the whole area of skin. Values are the mean  $\pm$  SD of 3 mice per each group. \*,  $P < 0.0001$  versus control siRNA-transfected FLS.

**Fig. S6.** Novel regulators for the inflammatory potential newly acquired in RA-FLS by the IL1 $\beta$  stimulation. (A) Potential regulators associated with the inflammatory potential newly acquired in RA-FLS by the IL1 $\beta$  stimulation. (B) A network model describing regulator-target gene relationships and their associated cellular processes.

## List of Supporting Tables

**Table S1.** Genes included in the network model (**Fig. S3A**).

**Table S2.** Module enrichment scores (MES) for the contribution of RA-FLS and RA-SM in each module.

**Table S3.** 13 candidate genes with gene name, Entrez gene id, and regulation factors.

**Table S4.** Sequences of gene specific primers used for real-time PCR.

## Supporting Dataset (*uploaded separately*)

**Dataset S1.** Lists of the DEGs in RA-FLS, RA-SM, and IL1 $\beta$ -stimulated RA-FLS. The list of the DEGs from each comparison includes Entrez ID, Gene description, *P*-value, and log<sub>2</sub>-fold-change.

## Supporting Movie (*uploaded separately*)

**Movie S1.** Real-time dynamics of FLS migration. Confluent cultures of RA-FLS transfected with POSTN siRNA (**A**) or control siRNA (**B**) were scratched, and wound closure was examined over a period of 50 h. Images were taken with Cell-IQ.

## **SI References**

1. Romanos GE, Asnani KP, Hingorani D, & Deshmukh VL (2013) Periostin: Role in formation and maintenance of dental tissues. *J Cell Physiol* (In Press).
2. Elliott CG, Kim SS, & Hamilton DW (2012) Functional significance of periostin in excisional skin repair: is the devil in the detail? *Cell Adh Migr* 6(4):319-326.
3. Naik PK, *et al.* (2012) Periostin promotes fibrosis and predicts progression in patients with idiopathic pulmonary fibrosis. *Am J Physiol Lung Cell Mol Physiol* 303(12):L1046-1056.
4. Morra L & Moch H (2011) Periostin expression and epithelial-mesenchymal transition in cancer: a review and an update. *Virchows Arch* 459(5):465-475.
5. Yan W & Shao R (2006) Transduction of a mesenchyme-specific gene periostin into 293T cells induces cell invasive activity through epithelial-mesenchymal transformation. *J Biol Chem* 281(28):19700-19708.
6. Otsuka K, *et al.* (2012) Periostin, a matricellular protein, accelerates cutaneous wound repair by activating dermal fibroblasts. *Exp Dermatol* 21(5):331-336.
7. Martin A & Cano A (2010) Tumorigenesis: Twist1 links EMT to self-renewal. *Nat Cell Biol* 12(10):924-925.
8. Lee MP & Yutzey KE (2011) Twist1 directly regulates genes that promote cell proliferation and migration in developing heart valves. *PLoS One* 6(12):e29758.
9. Oshima A, *et al.* (2002) A novel mechanism for the regulation of osteoblast differentiation: transcription of periostin, a member of the fasciclin I family, is regulated by the bHLH transcription factor, twist. *J Cell Biochem* 86(4):792-804.
10. Qin Q, Xu Y, He T, Qin C, & Xu J (2012) Normal and disease-related biological functions of Twist1 and underlying molecular mechanisms. *Cell Res* 22(1):90-106.

11. Yoo SA, *et al.* (2006) Calcineurin is expressed and plays a critical role in inflammatory arthritis. *J Immunol* 177(4):2681-2690.
12. Yoo SA, *et al.* (2012) A novel pathogenic role of the ER chaperone GRP78/BiP in rheumatoid arthritis. *J Exp Med* 209(4):871-886.
13. Bolstad BM, Irizarry RA, Astrand M, & Speed TP (2003) A comparison of normalization methods for high density oligonucleotide array data based on variance and bias. *Bioinformatics* 19(2):185-193.
14. Lee HJ, *et al.* (2010) Direct transfer of alpha-synuclein from neuron to astroglia causes inflammatory responses in synucleinopathies. *J Biol Chem* 285(12):9262-9272.
15. Huang da W, Sherman BT, & Lempicki RA (2009) Systematic and integrative analysis of large gene lists using DAVID bioinformatics resources. *Nat Protoc* 4(1):44-57.
16. You S, *et al.* (2012) A systems approach to rheumatoid arthritis. *PLoS One* 7(12):e51508.
17. Peri S, *et al.* (2004) Human protein reference database as a discovery resource for proteomics. *Nucleic Acids Res* 32(Database issue):D497-501.
18. Stark C, *et al.* (2006) BioGRID: a general repository for interaction datasets. *Nucleic Acids Res* 34(Database issue):D535-539.
19. von Mering C, *et al.* (2003) STRING: a database of predicted functional associations between proteins. *Nucleic Acids Res* 31(1):258-261.
20. Ogata H, *et al.* (1999) KEGG: Kyoto Encyclopedia of Genes and Genomes. *Nucleic Acids Res* 27(1):29-34.
21. Ashburner M, *et al.* (2000) Gene ontology: tool for the unification of biology. The Gene Ontology Consortium. *Nat Genet* 25(1):25-29.

22. Livak KJ & Schmittgen TD (2001) Analysis of relative gene expression data using real-time quantitative PCR and the 2(-Delta Delta C(T)) Method. *Methods* 25(4):402-408.
23. Lee MS, *et al.* (2006) Serum amyloid A binding to formyl peptide receptor-like 1 induces synovial hyperplasia and angiogenesis. *J Immunol* 177(8):5585-5594.
24. Yeum CE, Park EY, Lee SB, Chun HJ, & Chae GT (2013) Quantification of MSCs involved in wound healing: use of SIS to transfer MSCs to wound site and quantification of MSCs involved in skin wound healing. *J Tissue Eng Regen Med* 7(4):279-291.
25. Hwang D, *et al.* (2005) A data integration methodology for systems biology. *Proc Natl Acad Sci U S A* 102(48):17296-17301.



# Supporting information Fig. S1

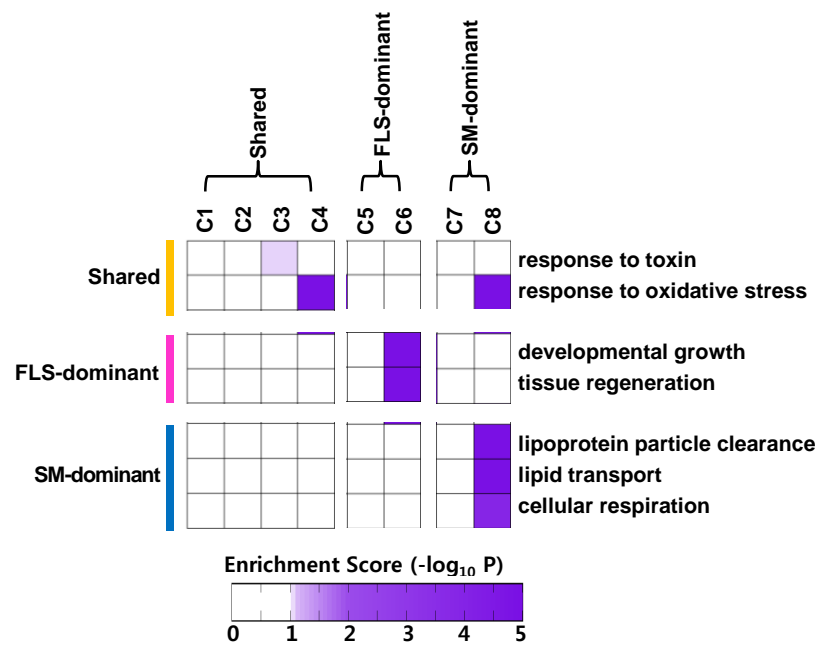

Supporting information Fig. S2

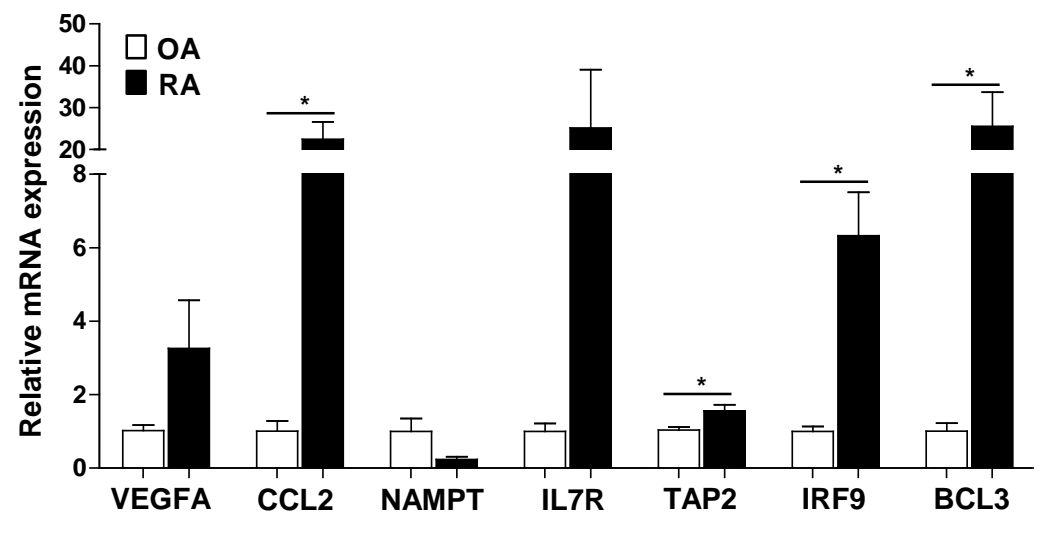

# Supporting information Fig. S3

**A**

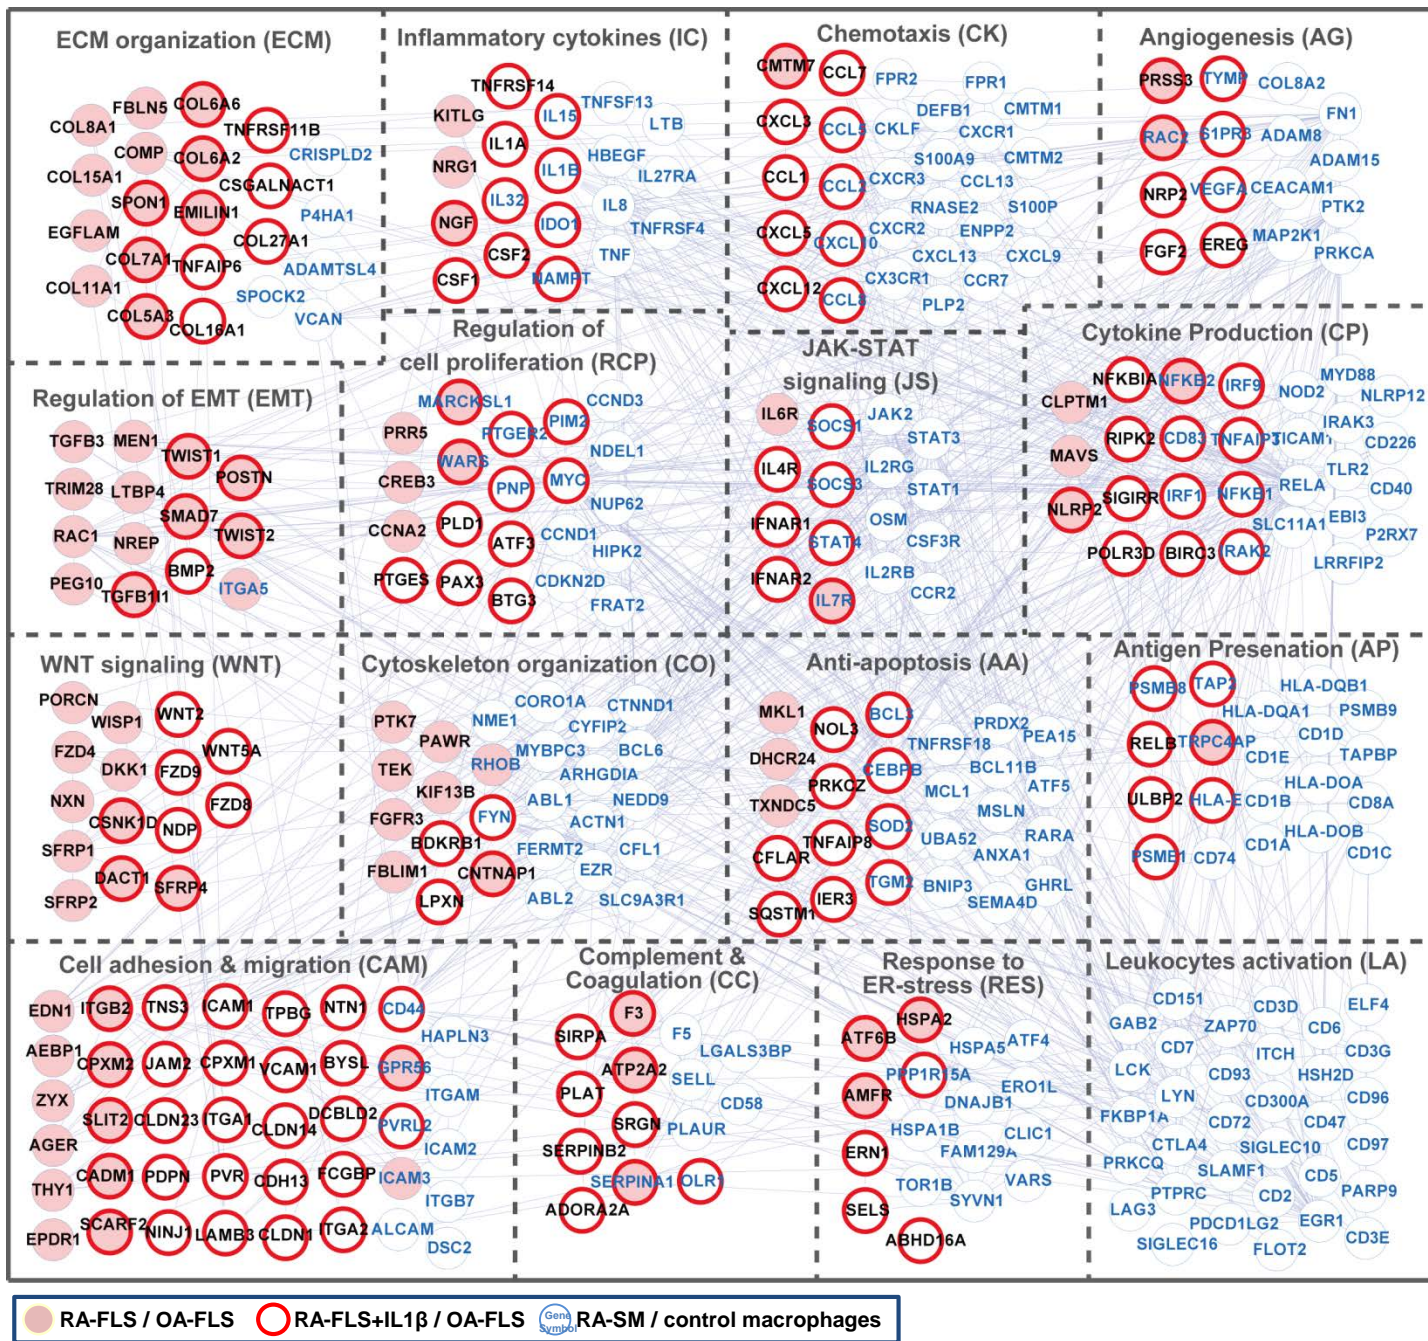

**B**

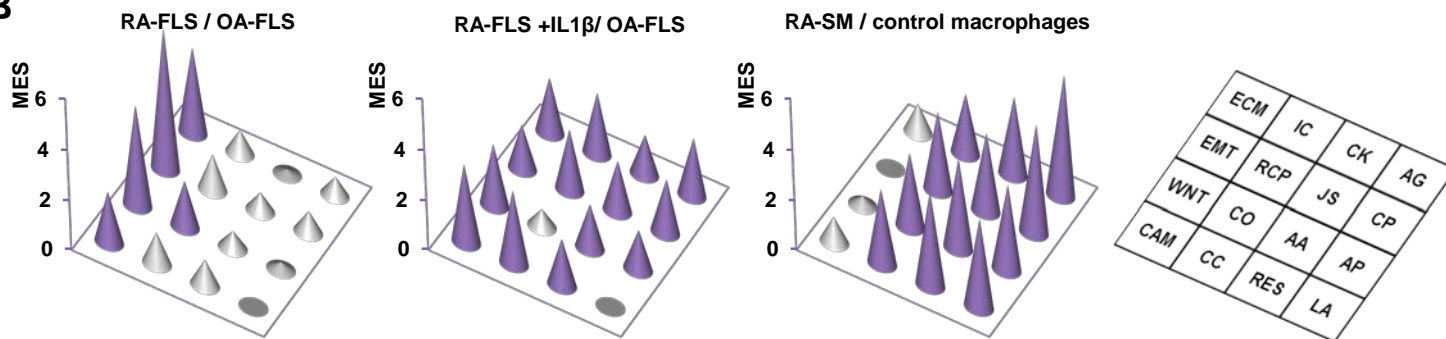

# Supporting information Fig. S4

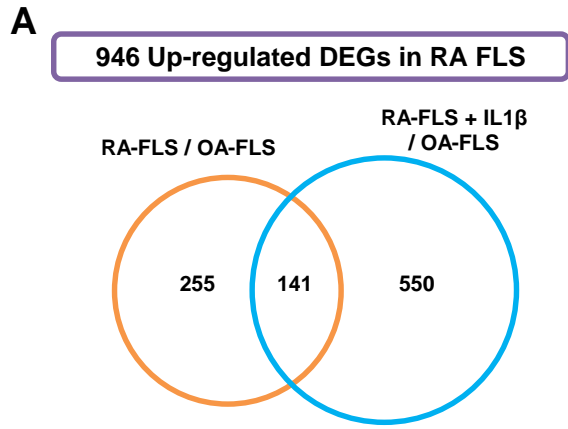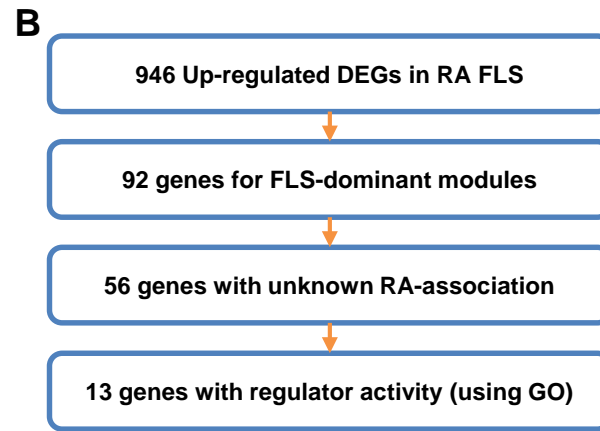



Supporting information Fig. S5

**A**

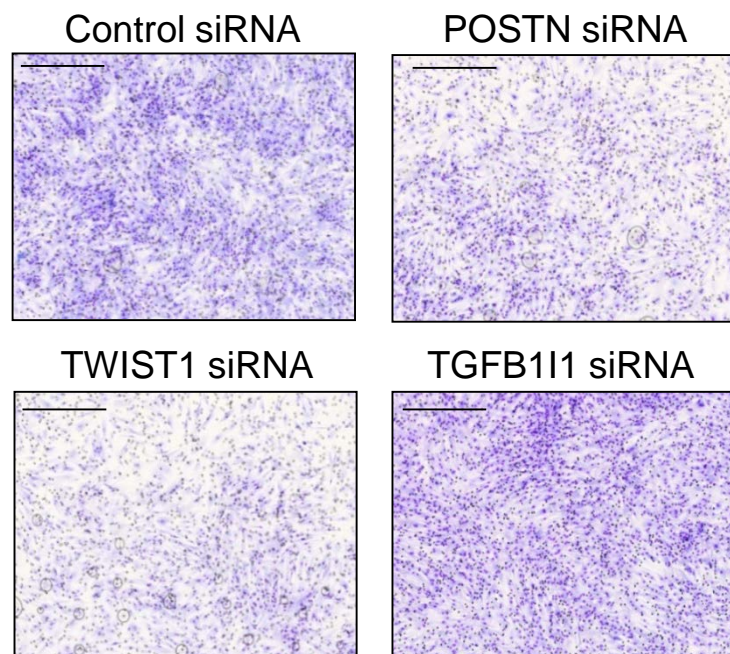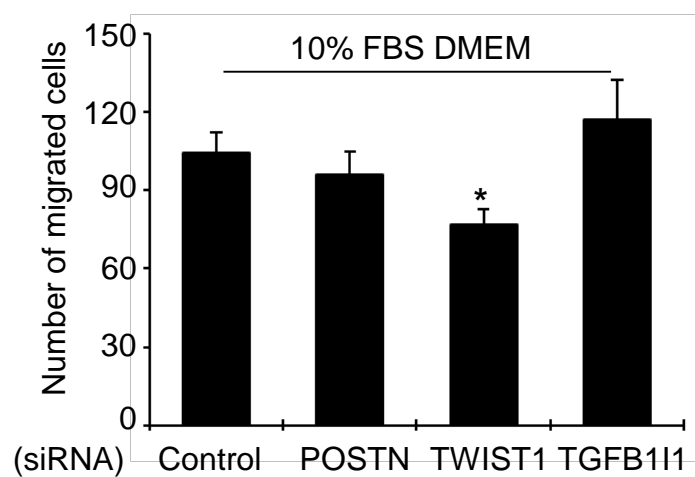

**B**

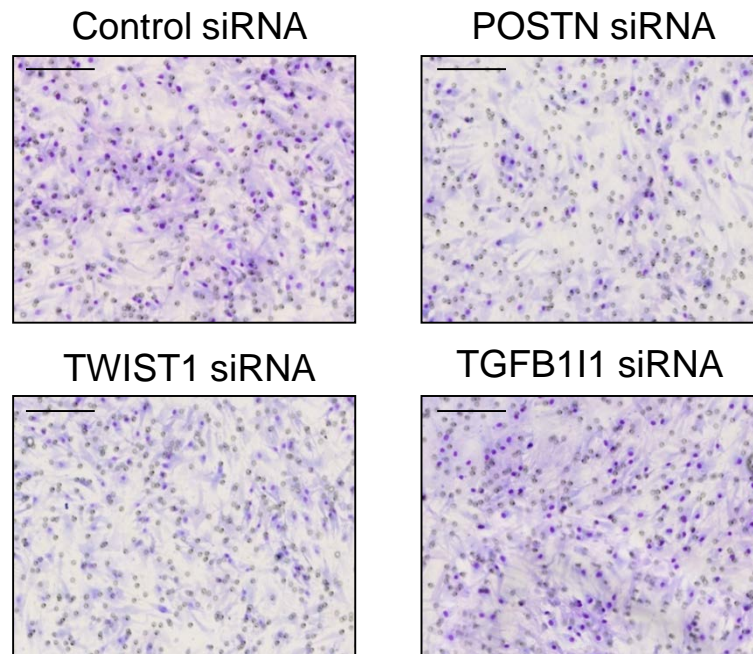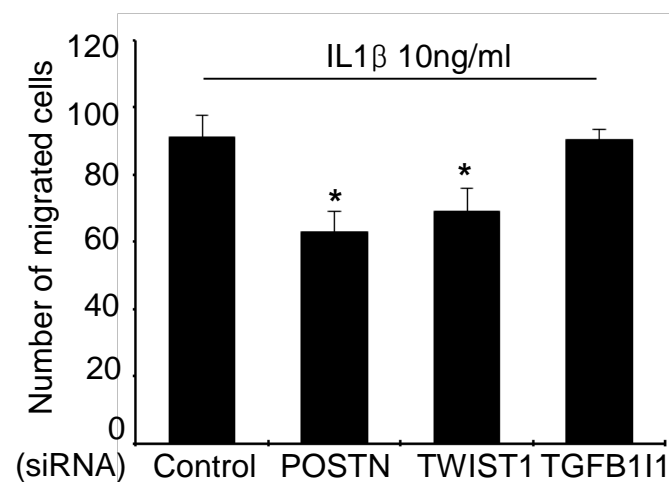

**C**

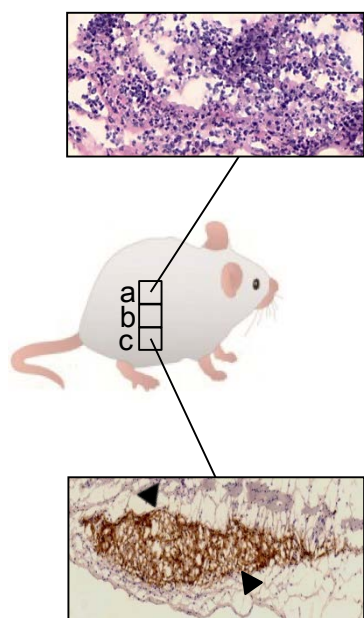

**D**

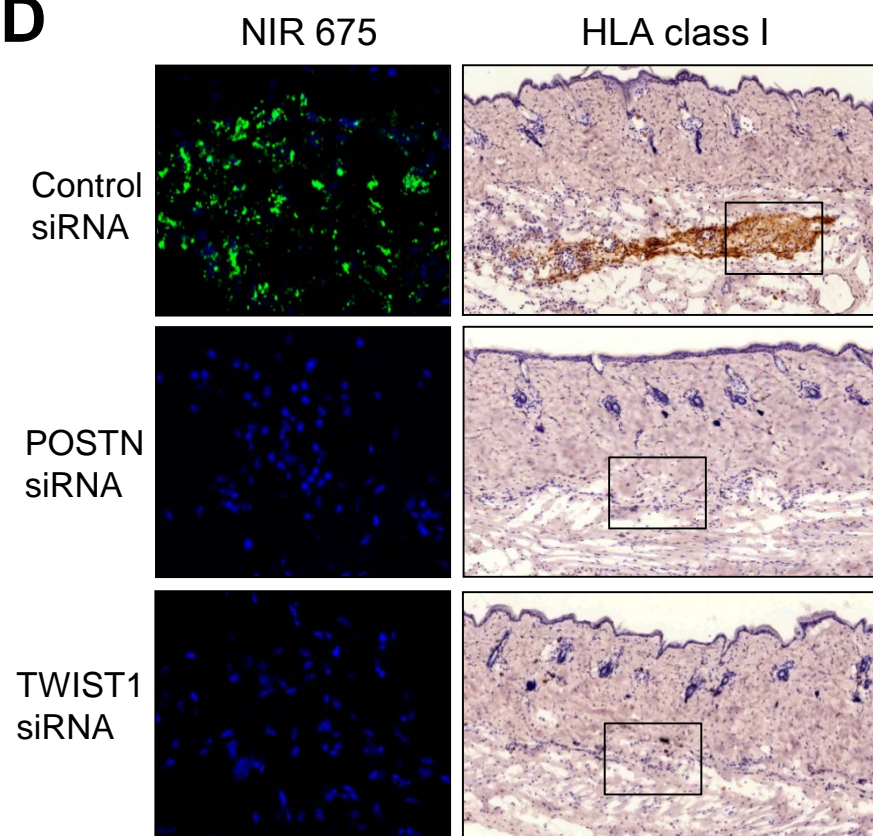

**E**

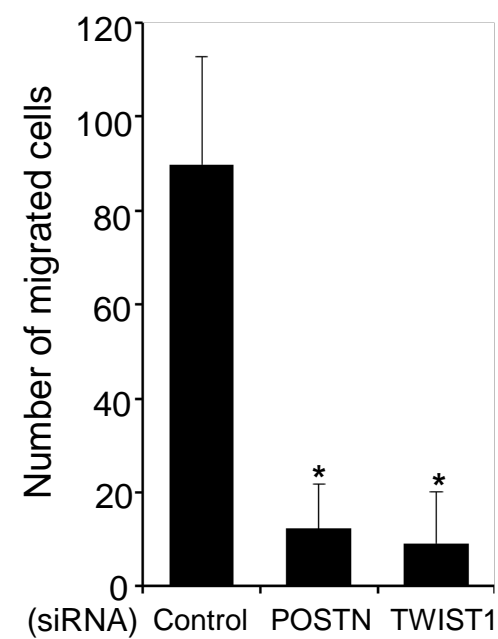

# Supporting information Fig. S6

**A**

| Gene Symbol | TF | Signaling |
|-------------|----|-----------|
| AMFR        | -  | 0         |
| ATF6B       | 0  | 0         |
| S1PR3       | -  | 0         |
| FYN         | -  | 0         |
| CXCL3       | -  | 0         |
| IFNAR1      | -  | 0         |
| IFNAR2      | -  | 0         |
| IER3        | -  | 0         |
| SLIT2       | -  | 0         |
| IRF9        | 0  | 0         |
| PIM2        | -  | 0         |
| PPP1R15A    | -  | 0         |
| TNFAIP8     | -  | 0         |
| SIGIRR      | -  | 0         |
| TWIST2      | 0  | -         |

**B**

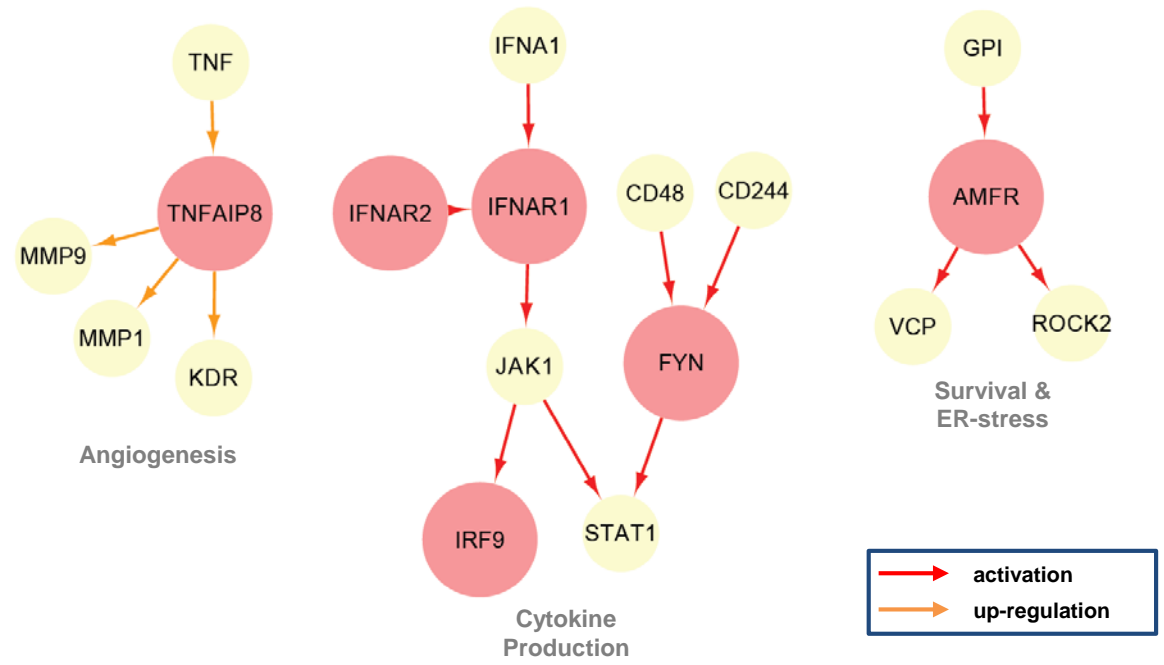

## Supporting information Table S1.

| Module name                            | MES Score       |                        |                             |
|----------------------------------------|-----------------|------------------------|-----------------------------|
|                                        | RA-FLS / OA-FLS | RA-FLS + IL1B / OA-FLS | RA-SM / control macrophages |
| ECM organization (ECM)                 | 3.412           | 2.218                  | 1.046                       |
| Regulation of EMT (EMT)                | 5.572           | 1.784                  | 0.37                        |
| WNT signaling (WNT)                    | 4.024           | 2.473                  | 0                           |
| Cell adhesion & migration (CAM)        | 2.061           | 3.167                  | 1.173                       |
| Inflammatory cytokines (IC)            | 0.953           | 2.441                  | 3.038                       |
| Regulation of cell proliferation (RCP) | 1.437           | 2.429                  | 2.978                       |
| Cytoskeleton organization (CO)         | 1.857           | 0.713                  | 3.145                       |
| Complement & coagulation (CC)          | 1.293           | 2.981                  | 2.405                       |
| Chemotaxis (CK)                        | 0.208           | 1.599                  | 3.815                       |
| JAK-STAT signaling (JS)                | 0.755           | 2.029                  | 3.608                       |
| Anti-apoptosis (AA)                    | 0.696           | 1.784                  | 3.145                       |
| Response to ER-stress (RES)            | 1.065           | 1.91                   | 3.113                       |
| Angiogenesis (AG)                      | 0.755           | 2.319                  | 3.608                       |
| Cytokine production (CP)               | 0.862           | 2.153                  | 3.436                       |
| Antigen presentation (AP)              | 0.302           | 1.623                  | 4.329                       |
| Leukocytes activation (LA)             | 0               | 0                      | 4.81                        |

**Supporting information Table S2.**

| Entrez ID | Gene Symbol | Differential expression |                             |                             |
|-----------|-------------|-------------------------|-----------------------------|-----------------------------|
|           |             | RA-FLS / OA-FLS         | RA-FLS+IL1 $\beta$ / OA-FLS | RA-SM / control macrophages |
| 2921      | CXCL3       | None                    | Up-regulated                | None                        |
| 4814      | NINJ1       | None                    | Up-regulated                | None                        |
| 5055      | SERPINB2    | None                    | Up-regulated                | None                        |
| 8651      | SOCS1       | None                    | Up-regulated                | Up-regulated                |
| 5027      | P2RX7       | None                    | None                        | Up-regulated                |
| 8837      | CFLAR       | None                    | Up-regulated                | None                        |
| 4790      | NFKB1       | None                    | Up-regulated                | Up-regulated                |
| 6286      | S100P       | None                    | None                        | Up-regulated                |
| 2534      | FYN         | None                    | Up-regulated                | Up-regulated                |
| 4739      | NEDD9       | None                    | None                        | Up-regulated                |
| 133584    | EGFLAM      | Up-regulated            | None                        | None                        |
| 5604      | MAP2K1      | None                    | None                        | Up-regulated                |
| 113540    | CMTM1       | None                    | None                        | Up-regulated                |
| 64919     | BCL11B      | None                    | None                        | Up-regulated                |
| 9308      | CD83        | None                    | Up-regulated                | Up-regulated                |
| 9021      | SOCS3       | None                    | Up-regulated                | Up-regulated                |
| 400709    | SIGLEC16    | None                    | None                        | Up-regulated                |
| 5329      | PLAUR       | None                    | None                        | Up-regulated                |
| 5033      | P4HA1       | None                    | None                        | Up-regulated                |
| 3914      | LAMB3       | None                    | Up-regulated                | None                        |
| 1295      | COL8A1      | Up-regulated            | None                        | None                        |
| 8325      | FZD8        | None                    | Up-regulated                | None                        |
| 3306      | HSPA2       | Up-regulated            | Up-regulated                | None                        |
| 1435      | CSF1        | None                    | Up-regulated                | None                        |
| 3552      | IL1A        | None                    | Up-regulated                | None                        |
| 3384      | ICAM2       | None                    | None                        | Up-regulated                |
| 7422      | VEGFA       | None                    | Up-regulated                | Up-regulated                |
| 5879      | RAC1        | Up-regulated            | None                        | None                        |
| 51339     | DACT1       | Up-regulated            | Up-regulated                | None                        |
| 2081      | ERN1        | None                    | Up-regulated                | None                        |
| 10135     | NAMPT       | None                    | Up-regulated                | Up-regulated                |
| 23562     | CLDN14      | None                    | Up-regulated                | None                        |
| 50509     | COL5A3      | Up-regulated            | Up-regulated                | None                        |
| 64759     | TNS3        | None                    | Up-regulated                | None                        |
| 165       | AEBP1       | Up-regulated            | None                        | None                        |
| 80380     | PDCD1LG2    | None                    | None                        | Up-regulated                |
| 5168      | ENPP2       | None                    | None                        | Up-regulated                |
| 55790     | CSGALNACT1  | None                    | Up-regulated                | None                        |
| 7412      | VCAM1       | None                    | Up-regulated                | None                        |
| 910       | CD1B        | None                    | None                        | Up-regulated                |
| 9289      | GPR56       | Up-regulated            | Up-regulated                | Up-regulated                |
| 1192      | CLIC1       | None                    | None                        | Up-regulated                |
| 6556      | SLC11A1     | None                    | None                        | Up-regulated                |
| 5588      | PRKCQ       | None                    | None                        | Up-regulated                |
| 11040     | PIM2        | None                    | Up-regulated                | Up-regulated                |
| 8996      | NOL3        | None                    | Up-regulated                | None                        |
| 117581    | TWIST2      | Up-regulated            | Up-regulated                | None                        |
| 6504      | SLAMF1      | None                    | None                        | Up-regulated                |
| 3575      | IL7R        | Up-regulated            | Up-regulated                | Up-regulated                |
| 7791      | ZYX         | Up-regulated            | None                        | None                        |

Table continues on the following page.



| Entrez ID | Gene Symbol | Differential expression |                             |                             |
|-----------|-------------|-------------------------|-----------------------------|-----------------------------|
|           |             | RA-FLS / OA-FLS         | RA-FLS+IL1 $\beta$ / OA-FLS | RA-SM / control macrophages |
| 6354      | CCL7        | None                    | Up-regulated                | None                        |
| 1231      | CCR2        | None                    | None                        | Up-regulated                |
| 5754      | PTK7        | Up-regulated            | None                        | None                        |
| 6355      | CCL8        | None                    | Up-regulated                | Up-regulated                |
| 7311      | UBA52       | None                    | None                        | Up-regulated                |
| 8425      | LTBP4       | Up-regulated            | None                        | None                        |
| 7130      | TNFAIP6     | None                    | Up-regulated                | None                        |
| 7052      | TGM2        | None                    | Up-regulated                | Up-regulated                |
| 10631     | POSTN       | Up-regulated            | Up-regulated                | None                        |
| 9404      | LPXN        | None                    | Up-regulated                | None                        |
| 976       | CD97        | None                    | None                        | Up-regulated                |
| 3717      | JAK2        | None                    | None                        | Up-regulated                |
| 6346      | CCL1        | None                    | Up-regulated                | None                        |
| 3133      | HLA-E       | None                    | Up-regulated                | Up-regulated                |
| 5698      | PSMB9       | None                    | None                        | Up-regulated                |
| 3695      | ITGB7       | None                    | None                        | Up-regulated                |
| 909       | CD1A        | None                    | None                        | Up-regulated                |
| 5077      | PAX3        | None                    | Up-regulated                | None                        |
| 916       | CD3E        | None                    | None                        | Up-regulated                |
| 101       | ADAM8       | None                    | None                        | Up-regulated                |
| 5646      | PRSS3       | Up-regulated            | Up-regulated                | None                        |
| 1437      | CSF2        | None                    | Up-regulated                | None                        |
| 3112      | HLA-DOB     | None                    | None                        | Up-regulated                |
| 5880      | RAC2        | Up-regulated            | Up-regulated                | Up-regulated                |
| 3689      | ITGB2       | Up-regulated            | Up-regulated                | None                        |
| 7001      | PRDX2       | None                    | None                        | Up-regulated                |
| 3455      | IFNAR2      | None                    | Up-regulated                | None                        |
| 1032      | CDKN2D      | None                    | None                        | Up-regulated                |
| 5817      | PVR         | None                    | Up-regulated                | None                        |
| 23303     | KIF13B      | Up-regulated            | None                        | None                        |
| 3553      | IL1B        | None                    | Up-regulated                | Up-regulated                |
| 9423      | NTN1        | None                    | Up-regulated                | None                        |
| 5590      | PRKCZ       | None                    | Up-regulated                | None                        |
| 54749     | EPDR1       | Up-regulated            | None                        | None                        |
| 22943     | DKK1        | Up-regulated            | None                        | None                        |
| 55655     | NLRP2       | Up-regulated            | Up-regulated                | None                        |
| 64359     | NXN         | Up-regulated            | None                        | None                        |
| 3672      | ITGA1       | None                    | Up-regulated                | None                        |
| 10666     | CD226       | None                    | None                        | Up-regulated                |
| 3111      | HLA-DOA     | None                    | None                        | Up-regulated                |
| 2152      | F3          | Up-regulated            | Up-regulated                | None                        |
| 7535      | ZAP70       | None                    | None                        | Up-regulated                |
| 1072      | CFL1        | None                    | None                        | Up-regulated                |
| 3385      | ICAM3       | Up-regulated            | None                        | Up-regulated                |
| 10516     | FBLN5       | Up-regulated            | None                        | None                        |
| 7097      | TLR2        | None                    | None                        | Up-regulated                |
| 1051      | CEBPB       | None                    | Up-regulated                | Up-regulated                |
| 9536      | PTGES       | None                    | Up-regulated                | None                        |
| 388       | RHOB        | Up-regulated            | None                        | Up-regulated                |
| 958       | CD40        | None                    | None                        | Up-regulated                |

Table continues on the following page.

| Entrez ID | Gene Symbol | Differential expression |                             |                             |
|-----------|-------------|-------------------------|-----------------------------|-----------------------------|
|           |             | RA-FLS / OA-FLS         | RA-FLS+IL1 $\beta$ / OA-FLS | RA-SM / control macrophages |
| 10232     | MSLN        | None                    | None                        | Up-regulated                |
| 89790     | SIGLEC10    | None                    | None                        | Up-regulated                |
| 58494     | JAM2        | None                    | Up-regulated                | None                        |
| 4609      | MYC         | None                    | Up-regulated                | Up-regulated                |
| 923       | CD6         | None                    | None                        | Up-regulated                |
| 54751     | FBLIM1      | Up-regulated            | None                        | None                        |
| 3560      | IL2RB       | None                    | None                        | Up-regulated                |
| 3932      | LCK         | None                    | None                        | Up-regulated                |
| 2261      | FGFR3       | Up-regulated            | None                        | None                        |
| 3627      | CXCL10      | None                    | Up-regulated                | Up-regulated                |
| 5337      | PLD1        | None                    | Up-regulated                | None                        |
| 5819      | PVRL2       | None                    | Up-regulated                | Up-regulated                |
| 56265     | CPXM1       | None                    | Up-regulated                | None                        |
| 11117     | EMILIN1     | Up-regulated            | Up-regulated                | None                        |
| 1453      | CSNK1D      | Up-regulated            | Up-regulated                | None                        |
| 3304      | HSPA1B      | None                    | None                        | Up-regulated                |
| 6352      | CCL5        | None                    | Up-regulated                | Up-regulated                |
| 4615      | MYD88       | None                    | None                        | Up-regulated                |
| 8741      | TNFSF13     | None                    | None                        | Up-regulated                |
| 10225     | CD96        | None                    | None                        | Up-regulated                |
| 4221      | MEN1        | Up-regulated            | None                        | None                        |
| 2000      | ELF4        | None                    | None                        | Up-regulated                |
| 1839      | HBEGF       | None                    | None                        | Up-regulated                |
| 488       | ATP2A2      | Up-regulated            | Up-regulated                | None                        |
| 914       | CD2         | None                    | None                        | Up-regulated                |
| 705       | BYSL        | None                    | Up-regulated                | None                        |
| 2358      | FPR2        | None                    | None                        | Up-regulated                |
| 28996     | HIPK2       | None                    | None                        | Up-regulated                |
| 9353      | SLIT2       | Up-regulated            | Up-regulated                | None                        |
| 6422      | SFRP1       | Up-regulated            | None                        | None                        |
| 23705     | CADM1       | Up-regulated            | Up-regulated                | None                        |
| 3566      | IL4R        | None                    | Up-regulated                | None                        |
| 2280      | FKBP1A      | None                    | None                        | Up-regulated                |
| 1209      | CLPTM1      | Up-regulated            | None                        | None                        |
| 8828      | NRP2        | None                    | Up-regulated                | None                        |
| 84447     | SYVN1       | None                    | None                        | Up-regulated                |
| 11151     | CORO1A      | None                    | None                        | Up-regulated                |
| 148022    | TICAM1      | None                    | None                        | Up-regulated                |
| 26999     | CYFIP2      | None                    | None                        | Up-regulated                |
| 5788      | PTPRC       | None                    | None                        | Up-regulated                |
| 83737     | ITCH        | None                    | None                        | Up-regulated                |
| 9209      | LRRFIP2     | None                    | None                        | Up-regulated                |
| 9846      | GAB2        | None                    | None                        | Up-regulated                |
| 83666     | PARP9       | None                    | None                        | Up-regulated                |
| 4860      | PNP         | None                    | Up-regulated                | Up-regulated                |
| 4607      | MYBPC3      | None                    | None                        | Up-regulated                |
| 9076      | CLDN1       | None                    | Up-regulated                | None                        |
| 59307     | SIGIRR      | None                    | Up-regulated                | None                        |
| 7070      | THY1        | Up-regulated            | None                        | None                        |
| 1524      | CX3CR1      | None                    | None                        | Up-regulated                |

Table continues on the following page.

| Entrez ID | Gene Symbol | Differential expression |                             |                             |
|-----------|-------------|-------------------------|-----------------------------|-----------------------------|
|           |             | RA-FLS / OA-FLS         | RA-FLS+IL1 $\beta$ / OA-FLS | RA-SM / control macrophages |
| 912       | CD1D        | None                    | None                        | Up-regulated                |
| 1824      | DSC2        | None                    | None                        | Up-regulated                |
| 2069      | EREG        | None                    | Up-regulated                | None                        |
| 604       | BCL6        | None                    | None                        | Up-regulated                |
| 9235      | IL32        | None                    | Up-regulated                | Up-regulated                |
| 3561      | IL2RG       | None                    | None                        | Up-regulated                |
| 6891      | TAP2        | None                    | Up-regulated                | Up-regulated                |
| 5327      | PLAT        | None                    | Up-regulated                | None                        |
| 4170      | MCL1        | None                    | None                        | Up-regulated                |
| 6402      | SELL        | None                    | None                        | Up-regulated                |
| 468       | ATF4        | None                    | None                        | Up-regulated                |
| 6648      | SOD2        | None                    | Up-regulated                | Up-regulated                |
| 3678      | ITGA5       | Up-regulated            | None                        | Up-regulated                |
| 1292      | COL6A2      | Up-regulated            | Up-regulated                | None                        |
| 1462      | VCAN        | None                    | None                        | Up-regulated                |
| 11213     | IRAK3       | None                    | None                        | Up-regulated                |
| 26133     | TRPC4AP     | Up-regulated            | Up-regulated                | Up-regulated                |
| 971       | CD72        | None                    | None                        | Up-regulated                |
| 6424      | SFRP4       | Up-regulated            | Up-regulated                | None                        |
| 6892      | TAPBP       | None                    | None                        | Up-regulated                |
| 1906      | EDN1        | Up-regulated            | None                        | None                        |
| 112616    | CMTM7       | Up-regulated            | Up-regulated                | None                        |
| 146225    | CMTM2       | None                    | None                        | Up-regulated                |
| 890       | CCNA2       | Up-regulated            | None                        | None                        |
| 1441      | CSF3R       | None                    | None                        | Up-regulated                |
| 1311      | COMP        | Up-regulated            | None                        | None                        |
| 83716     | CRISPLD2    | None                    | None                        | Up-regulated                |
| 4693      | NDP         | None                    | Up-regulated                | None                        |
| 2247      | FGF2        | None                    | Up-regulated                | None                        |
| 5696      | PSMB8       | None                    | Up-regulated                | Up-regulated                |
| 5747      | PTK2        | None                    | None                        | Up-regulated                |
| 10950     | BTG3        | None                    | Up-regulated                | None                        |
| 1012      | CDH13       | None                    | Up-regulated                | None                        |
| 6423      | SFRP2       | Up-regulated            | None                        | None                        |
| 30001     | ERO1L       | None                    | None                        | Up-regulated                |
| 23401     | FRAT2       | None                    | None                        | Up-regulated                |
| 8870      | IER3        | None                    | Up-regulated                | None                        |
| 4254      | KITLG       | Up-regulated            | None                        | None                        |
| 54507     | ADAMTSL4    | None                    | None                        | Up-regulated                |
| 3684      | ITGAM       | None                    | None                        | Up-regulated                |
| 960       | CD44        | None                    | Up-regulated                | Up-regulated                |
| 965       | CD58        | None                    | None                        | Up-regulated                |
| 8878      | SQSTM1      | None                    | Up-regulated                | None                        |
| 595       | CCND1       | None                    | None                        | Up-regulated                |
| 602       | BCL3        | None                    | Up-regulated                | Up-regulated                |
| 913       | CD1E        | None                    | None                        | Up-regulated                |
| 140885    | SIRPA       | None                    | Up-regulated                | None                        |
| 3959      | LGALS3BP    | None                    | None                        | Up-regulated                |
| 977       | CD151       | None                    | None                        | Up-regulated                |
| 1301      | COL11A1     | Up-regulated            | None                        | None                        |

Table continues on the following page.

| Entrez ID | Gene Symbol | Differential expression |                             |                             |
|-----------|-------------|-------------------------|-----------------------------|-----------------------------|
|           |             | RA-FLS / OA-FLS         | RA-FLS+IL1 $\beta$ / OA-FLS | RA-SM / control macrophages |
| 7041      | TGFB111     | Up-regulated            | Up-regulated                | None                        |
| 25        | ABL1        | None                    | None                        | Up-regulated                |
| 135       | ADORA2A     | None                    | Up-regulated                | None                        |
| 131566    | DCBLD2      | None                    | Up-regulated                | None                        |
| 7920      | ABHD16A     | None                    | Up-regulated                | None                        |
| 6387      | CXCL12      | None                    | Up-regulated                | None                        |
| 131873    | COL6A6      | Up-regulated            | Up-regulated                | None                        |
| 9315      | NREP        | Up-regulated            | None                        | None                        |
| 664       | BNIP3       | None                    | None                        | Up-regulated                |
| 7124      | TNF         | None                    | None                        | Up-regulated                |
| 3117      | HLA-DQA1    | None                    | None                        | Up-regulated                |
| 51192     | CKLF        | None                    | None                        | Up-regulated                |
| 4067      | LYN         | None                    | None                        | Up-regulated                |
| 396       | ARHGDI A    | None                    | None                        | Up-regulated                |
| 55615     | PRR5        | Up-regulated            | None                        | None                        |
| 3576      | IL8         | None                    | None                        | Up-regulated                |
| 4791      | NFKB2       | Up-regulated            | Up-regulated                | Up-regulated                |
| 1493      | CTLA4       | None                    | None                        | Up-regulated                |
| 915       | CD3D        | None                    | None                        | Up-regulated                |
| 1307      | COL16A1     | None                    | Up-regulated                | None                        |
| 650       | BMP2        | None                    | Up-regulated                | None                        |
| 3084      | NRG1        | Up-regulated            | None                        | None                        |
| 1236      | CCR7        | None                    | None                        | Up-regulated                |
| 4982      | TNFRSF11B   | None                    | Up-regulated                | None                        |
| 116496    | FAM129A     | None                    | None                        | Up-regulated                |
| 4283      | CXCL9       | None                    | None                        | Up-regulated                |
| 23089     | PEG10       | Up-regulated            | None                        | None                        |
| 2319      | FLOT2       | None                    | None                        | Up-regulated                |
| 5720      | PSME1       | None                    | Up-regulated                | Up-regulated                |
| 65108     | MARCKSL1    | Up-regulated            | Up-regulated                | Up-regulated                |
| 6775      | STAT4       | None                    | Up-regulated                | Up-regulated                |
| 3600      | IL15        | None                    | Up-regulated                | Up-regulated                |
| 924       | CD7         | None                    | None                        | Up-regulated                |
| 972       | CD74        | None                    | None                        | Up-regulated                |
| 8751      | ADAM15      | None                    | None                        | Up-regulated                |
| 8322      | FZD4        | Up-regulated            | None                        | None                        |
| 3570      | IL6R        | Up-regulated            | None                        | None                        |
| 4092      | SMAD7       | Up-regulated            | Up-regulated                | None                        |
| 119587    | CPXM2       | Up-regulated            | Up-regulated                | None                        |
| 7128      | TNFAIP3     | None                    | Up-regulated                | Up-regulated                |
| 57506     | MAVS        | Up-regulated            | None                        | None                        |
| 81565     | NDEL1       | None                    | None                        | Up-regulated                |
| 10563     | CXCL13      | None                    | None                        | Up-regulated                |
| 64840     | PORCN       | Up-regulated            | None                        | None                        |
| 1958      | EGR1        | None                    | None                        | Up-regulated                |
| 7291      | TWIST1      | Up-regulated            | Up-regulated                | None                        |
| 9466      | IL27RA      | None                    | None                        | Up-regulated                |
| 3620      | IDO1        | None                    | Up-regulated                | Up-regulated                |
| 1903      | S1PR3       | None                    | Up-regulated                | Up-regulated                |
| 27        | ABL2        | None                    | None                        | Up-regulated                |

Table continues on the following page.

| Entrez ID | Gene Symbol | Differential expression |                             |                             |
|-----------|-------------|-------------------------|-----------------------------|-----------------------------|
|           |             | RA-FLS / OA-FLS         | RA-FLS+IL1 $\beta$ / OA-FLS | RA-SM / control macrophages |
| 5732      | PTGER2      | None                    | Up-regulated                | Up-regulated                |
| 27348     | TOR1B       | None                    | None                        | Up-regulated                |
| 3577      | CXCR1       | None                    | None                        | Up-regulated                |
| 1388      | ATF6B       | Up-regulated            | Up-regulated                | None                        |
| 896       | CCND3       | None                    | None                        | Up-regulated                |
| 330       | BIRC3       | None                    | Up-regulated                | None                        |
| 11314     | CD300A      | None                    | None                        | Up-regulated                |
| 6280      | S100A9      | None                    | None                        | Up-regulated                |
| 10979     | FERMT2      | None                    | None                        | Up-regulated                |
| 1500      | CTNND1      | None                    | None                        | Up-regulated                |
| 3902      | LAG3        | None                    | None                        | Up-regulated                |
| 5970      | RELA        | None                    | None                        | Up-regulated                |
| 3673      | ITGA2       | None                    | Up-regulated                | None                        |
| 10418     | SPON1       | Up-regulated            | Up-regulated                | None                        |
| 3579      | CXCR2       | None                    | None                        | Up-regulated                |
| 10155     | TRIM28      | Up-regulated            | None                        | None                        |
| 1294      | COL7A1      | Up-regulated            | Up-regulated                | None                        |
| 85301     | COL27A1     | None                    | Up-regulated                | None                        |
| 5265      | SERPINA1    | Up-regulated            | Up-regulated                | Up-regulated                |
| 7407      | VARS        | None                    | None                        | Up-regulated                |
| 8764      | TNFRSF14    | None                    | Up-regulated                | None                        |
| 5008      | OSM         | None                    | None                        | Up-regulated                |
| 7293      | TNFRSF4     | None                    | None                        | Up-regulated                |
| 1306      | COL15A1     | Up-regulated            | None                        | None                        |
| 2335      | FN1         | None                    | None                        | Up-regulated                |
| 80328     | ULBP2       | None                    | Up-regulated                | None                        |
| 7474      | WNT5A       | None                    | Up-regulated                | None                        |
| 1672      | DEFB1       | None                    | None                        | Up-regulated                |
| 921       | CD5         | None                    | None                        | Up-regulated                |
| 267       | AMFR        | Up-regulated            | Up-regulated                | None                        |
| 6774      | STAT3       | None                    | None                        | Up-regulated                |
| 8506      | CNTNAP1     | Up-regulated            | Up-regulated                | None                        |
| 6036      | RNASE2      | None                    | None                        | Up-regulated                |
| 917       | CD3G        | None                    | None                        | Up-regulated                |
| 10148     | EBI3        | None                    | None                        | Up-regulated                |
| 145864    | HAPLN3      | None                    | None                        | Up-regulated                |
| 10507     | SEMA4D      | None                    | None                        | Up-regulated                |
| 23645     | PPP1R15A    | None                    | Up-regulated                | Up-regulated                |
| 5355      | PLP2        | None                    | None                        | Up-regulated                |
| 22918     | CD93        | None                    | None                        | Up-regulated                |
| 3119      | HLA-DQB1    | None                    | None                        | Up-regulated                |
| 961       | CD47        | None                    | None                        | Up-regulated                |
| 137075    | CLDN23      | None                    | Up-regulated                | None                        |
| 4803      | NGF         | Up-regulated            | Up-regulated                | None                        |
| 5578      | PRKCA       | None                    | None                        | Up-regulated                |
| 8840      | WISP1       | Up-regulated            | None                        | None                        |
| 1296      | COL8A2      | None                    | None                        | Up-regulated                |
| 2833      | CXCR3       | None                    | None                        | Up-regulated                |
| 8682      | PEA15       | None                    | None                        | Up-regulated                |
| 214       | ALCAM       | None                    | None                        | Up-regulated                |

Table continues on the following page.

| Entrez ID | Gene Symbol | Differential expression |                             |                             |
|-----------|-------------|-------------------------|-----------------------------|-----------------------------|
|           |             | RA-FLS / OA-FLS         | RA-FLS+IL1 $\beta$ / OA-FLS | RA-SM / control macrophages |
| 3309      | HSPA5       | None                    | None                        | Up-regulated                |
| 55829     | SELS        | None                    | Up-regulated                | None                        |
| 3454      | IFNAR1      | None                    | Up-regulated                | None                        |
| 5914      | RARA        | None                    | None                        | Up-regulated                |
| 91179     | SCARF2      | Up-regulated            | Up-regulated                | None                        |
| 6772      | STAT1       | None                    | None                        | Up-regulated                |
| 25816     | TNFAIP8     | None                    | Up-regulated                | None                        |
| 7453      | WARS        | Up-regulated            | Up-regulated                | Up-regulated                |
| 4830      | NME1        | None                    | None                        | Up-regulated                |
| 10630     | PDPN        | None                    | Up-regulated                | None                        |
| 4792      | NFKBIA      | None                    | Up-regulated                | None                        |
| 7010      | TEK         | Up-regulated            | None                        | None                        |
| 3656      | IRAK2       | None                    | Up-regulated                | Up-regulated                |
| 634       | CEACAM1     | None                    | None                        | Up-regulated                |
| 9368      | SLC9A3R1    | None                    | None                        | Up-regulated                |
| 301       | ANXA1       | None                    | None                        | Up-regulated                |
| 5971      | RELB        | None                    | Up-regulated                | None                        |
| 2153      | F5          | None                    | None                        | Up-regulated                |
| 10379     | IRF9        | None                    | Up-regulated                | Up-regulated                |
| 661       | POLR3D      | None                    | Up-regulated                | None                        |
| 177       | AGER        | Up-regulated            | None                        | None                        |
| 51738     | GHRL        | None                    | None                        | Up-regulated                |
| 91662     | NLRP12      | None                    | None                        | Up-regulated                |
| 7043      | TGFB3       | Up-regulated            | None                        | None                        |
| 22809     | ATF5        | None                    | None                        | Up-regulated                |
| 8767      | RIPK2       | None                    | Up-regulated                | None                        |
| 6357      | CCL13       | None                    | None                        | Up-regulated                |
| 1890      | TYMP        | None                    | Up-regulated                | Up-regulated                |
| 3659      | IRF1        | None                    | Up-regulated                | Up-regulated                |
| 2357      | FPR1        | None                    | None                        | Up-regulated                |
| 1718      | DHCR24      | Up-regulated            | None                        | None                        |
| 3337      | DNAJB1      | None                    | None                        | Up-regulated                |
| 623       | BDKRB1      | None                    | Up-regulated                | None                        |
| 4050      | LTB         | None                    | None                        | Up-regulated                |
| 467       | ATF3        | None                    | Up-regulated                | None                        |
| 10488     | CREB3       | Up-regulated            | None                        | None                        |
| 8857      | FCGBP       | None                    | Up-regulated                | None                        |
| 57591     | MKL1        | Up-regulated            | None                        | None                        |
| 8326      | FZD9        | None                    | Up-regulated                | None                        |
| 9806      | SPOCK2      | None                    | None                        | Up-regulated                |
| 6374      | CXCL5       | None                    | Up-regulated                | None                        |
| 7430      | EZR         | None                    | None                        | Up-regulated                |
| 81567     | TXNDC5      | Up-regulated            | None                        | None                        |
| 64127     | NOD2        | None                    | None                        | Up-regulated                |
| 23636     | NUP62       | None                    | None                        | Up-regulated                |
| 7162      | TPBG        | None                    | Up-regulated                | None                        |
| 3383      | ICAM1       | None                    | Up-regulated                | None                        |
| 4973      | OLR1        | None                    | Up-regulated                | Up-regulated                |
| 5552      | SRGN        | None                    | Up-regulated                | None                        |
| 911       | CD1C        | None                    | None                        | Up-regulated                |

Table continues on the following page.

---

**Differential expression**

---

| <b>Entrez ID</b> | <b>Gene Symbol</b> | <b>RA-FLS / OA-FLS</b> | <b>RA-FLS+IL1<math>\beta</math> / OA-FLS</b> | <b>RA-SM / control macrophages</b> |
|------------------|--------------------|------------------------|----------------------------------------------|------------------------------------|
| 925              | CD8A               | None                   | None                                         | Up-regulated                       |
| 5074             | PAWR               | Up-regulated           | None                                         | None                               |
| 8784             | TNFRSF18           | None                   | None                                         | Up-regulated                       |
| 87               | ACTN1              | None                   | None                                         | Up-regulated                       |
| 84941            | HSH2D              | None                   | None                                         | Up-regulated                       |
| 6347             | CCL2               | None                   | Up-regulated                                 | Up-regulated                       |
| 7472             | WNT2               | None                   | Up-regulated                                 | None                               |

---

**Supporting information Table S3.**

| <b>Protein 1</b> | <b>Entrez ID</b> | <b>Interaction</b> | <b>Protein 2</b> | <b>Entrez ID</b> | <b>Evidence (PubMed ID)</b> |
|------------------|------------------|--------------------|------------------|------------------|-----------------------------|
| TWIST1           | 7291             | up-regulation      | TIMP1            | 7076             | 19513566                    |
| TWIST1           | 7291             | inhibition         | TP53             | 7157             | 18504427                    |
| TWIST1           | 7291             | up-regulation      | FN1              | 2335             | 17512904                    |
| TWIST1           | 7291             | up-regulation      | CDH2             | 1000             | 17512904                    |
| TWIST1           | 7291             | down-regulation    | CDH1             | 999              | 20025748                    |
| TGFB111          | 7041             | up-regulation      | TGFB1            | 7040             | 17671518                    |
| SMAD7            | 4092             | up-regulation      | TGFB111          | 7041             | 18762808                    |
| TGFB1            | 7040             | activation         | SMAD7            | 4092             | 18762808                    |
| POSTN            | 10631            | activation         | TNC              | 3371             | 19887451                    |
| TAB1             | 10454            | activation         | MAP3K7           | 6885             | 19578758                    |
| POSTN            | 10631            | activation         | KDR              | 3791             | 15082792                    |
| POSTN            | 10631            | activation         | MAP3K7           | 6885             | 19578758                    |
| POSTN            | 10631            | activation         | AKT1             | 207              | 19328625                    |
| POSTN            | 10631            | activation         | TAB1             | 10454            | 19578758                    |
| TGFB111          | 7041             | up-regulation      | FOS              | 2353             | 12445807                    |
| TWIST1           | 7291             | up-regulation      | POSTN            | 10631            | 12210745                    |
| TGFB1            | 7040             | up-regulation      | POSTN            | 10631            | 20660732                    |
| STAT3            | 6774             | up-regulation      | TWIST1           | 7291             | 18353781                    |
| POSTN            | 10631            | activation         | KDR              | 3791             | 15082792                    |
| TNF              | 7124             | up-regulation      | TGFB111          | 7041             | 11489729                    |
| TWIST1           | 7291             | up-regulation      | TNF              | 7124             | 20007935                    |
| TWIST1           | 7291             | up-regulation      | IL6              | 3569             | 20007935                    |
| TWIST1           | 7291             | up-regulation      | CCL2             | 6347             | 20007935                    |
| TGFB1            | 7040             | activation         | TWIST1           | 7291             | 17684115                    |
| TGFB1            | 7040             | activation         | CTNNB1           | 1499             | 17684115                    |
| TGFB1            | 7040             | up-regulation      | ACTA2            | 59               | 18401422                    |
| TWIST1           | 7291             | up-regulation      | CDH11            | 1009             | 22242143                    |
| WNT1             | 7471             | activation         | TWIST1           | 7291             | 12702582                    |
| POSTN            | 10631            | up-regulation      | ACTA2            | 59               | 19619531                    |
| WNT1             | 7471             | activation         | CTNNB1           | 1499             | 12702582                    |

Table continues on the following page.



| <b>Protein 1</b> | <b>Entrez ID</b> | <b>Interaction</b> | <b>Protein 2</b> | <b>Entrez ID</b> | <b>Evidence<br/>(PubMed ID)</b> |
|------------------|------------------|--------------------|------------------|------------------|---------------------------------|
| TRIM28           | 10155            | activation         | ZNF74            | 7625             | 12684500                        |
| TRIM28           | 10155            | activation         | NR3C1            | 2908             | 9742105                         |
| TRIM28           | 10155            | inhibition         | TP53             | 7157             | 16107876                        |
| TRIM28           | 10155            | activation         | STAT1            | 6772             | 18381204                        |
| TRIM28           | 10155            | inhibition         | E2F1             | 1869             | 17704056                        |
| TWIST2           | 117581           | down-regulation    | CD7              | 924              | 19937140                        |
| TWIST2           | 117581           | inhibition         | MYEF2            | 50804            | 11809751                        |
| MEN1             | 4221             | activation         | FANCD2           | 2177             | 12874027                        |
| MEN1             | 4221             | inhibition         | PRL              | 5617             | 12459032                        |
| MEN1             | 4221             | activation         | CEBPB            | 1051             | 19074834                        |
| MEN1             | 4221             | down-regulation    | TERT             | 7015             | 18636154                        |
| MEN1             | 4221             | inhibition         | JUND             | 3727             | 9989505                         |
| AEBP1            | 165              | activation         | PPARG            | 5468             | 20419060                        |
| AEBP1            | 165              | activation         | NR1H3            | 10062            | 20419060                        |
| AEBP1            | 165              | activation         | MAPK1            | 5594             | 17299101                        |
| AEBP1            | 165              | activation         | MAPK3            | 5595             | 17299101                        |
| COL15A1          | 1306             | activation         | COL18A1          | 80781            | 23621901                        |
| CSNK1D           | 1453             | activation         | CTNNB1           | 1499             | 11818547                        |
| CSNK1D           | 1453             | activation         | DVL1             | 1855             | 11818547                        |
| CSNK1D           | 1453             | activation         | AXIN1            | 8312             | 11818547                        |
| CSNK1D           | 1453             | activation         | APC              | 324              | 11818547                        |
| ZYX              | 7791             | activation         | VASP             | 7408             | 7644520                         |
| ZYX              | 7791             | activation         | ACTN1            | 87               | 10613911                        |
| WISP1            | 8840             | up-regulation      | VCAM1            | 7412             | 23313051                        |
| WISP1            | 8840             | up-regulation      | MMP2             | 4313             | 21453685                        |
| GPR56            | 9289             | activation         | TGM2             | 7052             | 16757564                        |

**Supporting information Table S4.**

| <b>Symbol</b> | <b>Forward</b>          | <b>Reverse</b>       | <b>Sequence Reference</b> |
|---------------|-------------------------|----------------------|---------------------------|
| TWIST1        | ATCAAACCTGGCCTGCAAAC    | TGCATTTTACCATGGGTCCT | NM_000474.3               |
| TGFB11        | CTTGCAATTCCAGCGAATC     | AGAGGTGGAATGCGTGTGTT | NM_015927.3               |
| POSTN         | GCAGACACACCTGTTGGAAA    | GTCACGGGGATTTCTTTGAA | NM_006475.1               |
| CSNK1D        | CCCATGGATGCTTTCTCAAT    | GGGTCCAGCAACAAAGAAAA | NM_001893.3               |
| SMAD7         | AGCTGCAGATGGATGTTTCC    | TCTTTCAGGGTTTGGGAATG | NM_005904.2               |
| VEGFA         | AGTTTTGGGAACACCGACAA    | AAGCACAGCAATGTCCTGAA | NM_001025367.1            |
| CCL2          | GCTGAGACTAACCCAGAAACATC | GGAATGAAGGTGGCTGCTAT | NM_002982.3               |
| NAMPT         | GCCAAATGAGAATCGCAAAG    | ATGCAAGGCACACTCCTTTT | NM_005746.2               |
| IL7R          | GGAGCCAATGACTTTGTGGT    | TCACATGCGTCCATTTGTTT | NM_002185.2               |
| IRF9          | CATGCAGAACTGCACACTCA    | GCTGCTCCCAATGTCTGAAT | NM_006084.4               |
| TAP2          | TCTGGGAACCACAGATGTCA    | AAGCGACAAGAAGGGGAAAT | NM_018833.2               |
| BCL3          | GTGAACGCGCAAATGTACTC    | TCGTTGTGGCAGTTCTTGAG | NM_005178.2               |
| TNF           | AAGAGAATTGGGGGCTTAGG    | AGGCCCCAGTTTGAATTCTT | NM_000594.2               |
| CDH11         | GTGACCCTGAGAAGGCCAAAA   | GATTCTGGAGGGTGGCAATA | NM_001797.2               |
| ACTA2         | TCCTCATCCTCCCTTGAGAA    | ATGAAGGATGGCTGGAACAG | NM_001613.1               |
